# Supplementary material for: Phase II clinical trial of adoptive cell therapy for patients with metastatic melanoma with autologous tumor-infiltrating lymphocytes and low-dose interleukin-2
Source: Springer Nature journal article supplement (doi:10.1007/s00262-019-02307-x), 2019-02-11
Supplement: MOESM1 [file 16465538]

| Patient | Infusion Product                         | Week 1 post-infusion                                             | Week 4 post-infusion            |
|---------|------------------------------------------|------------------------------------------------------------------|---------------------------------|
| 1       | Vβ13.1 (52%)<br>Vβ8 (21%)                | <b>Vβ13.1 (76%)*</b><br><b>Vβ8 (8.9%)*</b><br>Vβ16 (4.2%)        |                                 |
| 2       | Vβ8 (14%)                                |                                                                  |                                 |
| 3       |                                          |                                                                  |                                 |
| 4       |                                          | Vβ13.1 (20%)                                                     | Vβ13.2 (36%)<br>Vβ23 (19%)      |
| 5       | Vβ13.2 (54%)<br>Vβ17 (7.8%)<br>Vβ2 (26%) | <b>Vβ13.2 (56%)*</b><br><b>Vβ17 (19%)*</b><br><b>Vβ2 (7.0%)*</b> |                                 |
| 6       |                                          | Vβ5.1 (16%)<br>Vβ22 (18%)                                        | Vβ17 (13%)<br>Vβ2 (12%)         |
| 7       | Vβ5.1 (38%)                              | <b>Vβ5.1 (17%)*</b>                                              |                                 |
| 8       |                                          |                                                                  |                                 |
| 9       | Vβ2 (13%)                                | Vβ14 (11%)                                                       | Vβ21.3 (16%)                    |
| 10      | Vβ17 (12%)<br>Vβ5.1 (9.8%)<br>Vβ1 (11%)  | <b>Vβ17 (87%)*</b><br><b>Vβ5.1 (12%)*</b>                        | <b>Vβ17 (11%)*</b>              |
| 11      | Vβ7.1 (92%)                              | <b>Vβ7.1 (87%)</b>                                               | Vβ2 (11%)                       |
| 12      | Vβ13.1 (15%)<br>Vβ22 (41%)               | <b>Vβ13.1 (25%)*</b><br>Vβ2 (12%)                                | Vβ2 (10%)<br><b>Vβ22 (15%)*</b> |

Vβ, T cell receptor beta chain

\***Bold** denotes Vβ population that was also dominant in the infusion product

### Supplementary Table 1. Dominant TCR Vβ populations in the CD8+ compartment

The TCR Vβ repertoire of the CD8+ compartment of TIL infusion products, and peripheral blood at 1 and 4 weeks post-infusion were analyzed using the IOTest Beta Mark Kit (Beckman-Coulter). Shown are the dominant TCR Vβ populations, as defined by any Vβ chain whose frequency was considered to be a statistical outlier in the repertoire of the 24 Vβ chains that were analyzed. An outlier test was used to define a Vβ as dominant if its frequency was at least three interquartile distances away from the third quartile of all the Vβ chains analyzed.

| Patient | Infusion Product        | Week 1 post-infusion            | Week 4 post-infusion     |
|---------|-------------------------|---------------------------------|--------------------------|
| 1       |                         | Vβ5.1 (10%)<br>Vβ2 (12%)        |                          |
| 2       |                         |                                 | Vβ2 (17%)                |
| 3       |                         |                                 |                          |
| 4       | Vβ2 (16%)               |                                 |                          |
| 5       | Vβ2 (18%)               | Vβ17 (30%)<br><b>Vβ2 (16%)*</b> |                          |
| 6       |                         | Vβ17 (8.3%)                     | Vβ2 (11%)                |
| 7       |                         |                                 |                          |
| 8       |                         | Vβ4 (23%)                       | Vβ4 (55%)                |
| 9       | Vβ23 (12%)<br>Vβ8 (12%) |                                 |                          |
| 10      |                         |                                 |                          |
| 11      |                         |                                 | Vβ2 (11%)                |
| 12      |                         |                                 | Vβ2 (11%)<br>Vβ17 (8.9%) |

Vβ, T cell receptor beta chain

\***Bold** denotes Vβ population that was also dominant in the infusion product

### Supplementary Table 2. Dominant TCR Vβ populations in the CD4+ compartment

The TCR Vβ repertoire of the CD4+ compartment of TIL infusion products, and peripheral blood at 1 and 4 weeks post-infusion were analyzed using the IOTest Beta Mark Kit (Beckman-Coulter). Shown are the dominant TCR Vβ populations, as defined by any Vβ chain whose frequency was considered to be a statistical outlier in the repertoire of the 24 Vβ chains that were analyzed. An outlier test was used to define a Vβ as dominant if its frequency was at least three interquartile distances away from the third quartile of all the Vβ chains analyzed.

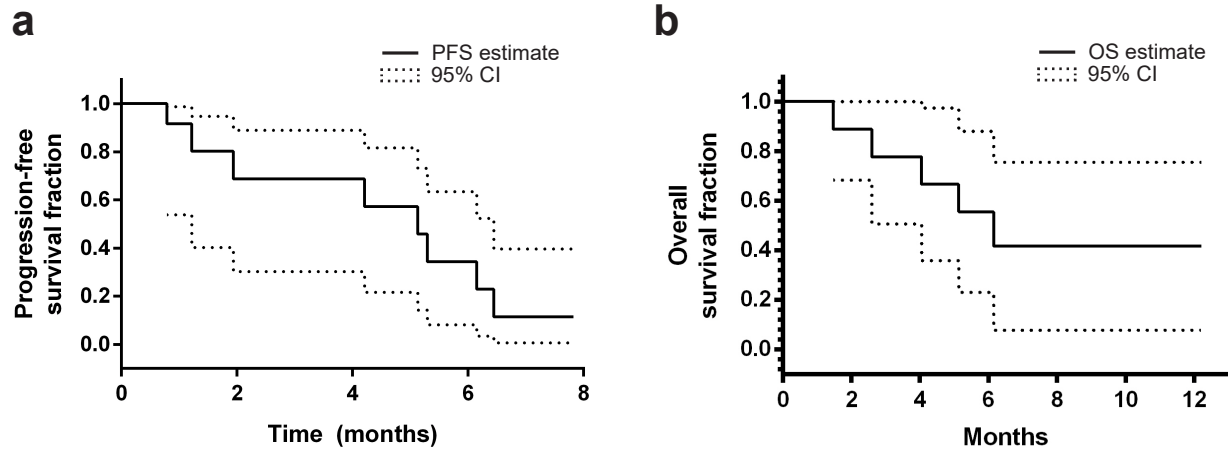

**Supplementary Figure 1. Survival curves**

**a.** Progression-free survival. Twelve patients were included in the analysis and eight events (both RECIST and irRC PD or death) were observed. The estimated median PFS time was 5.1 months (95% CI: 1.2 – 6.4 months) **b.** Overall survival. Twelve patients were included in the analysis and five events (death) were observed. Median OS was estimated to be 6.2 months (95% CI: 1.5 to not reached).

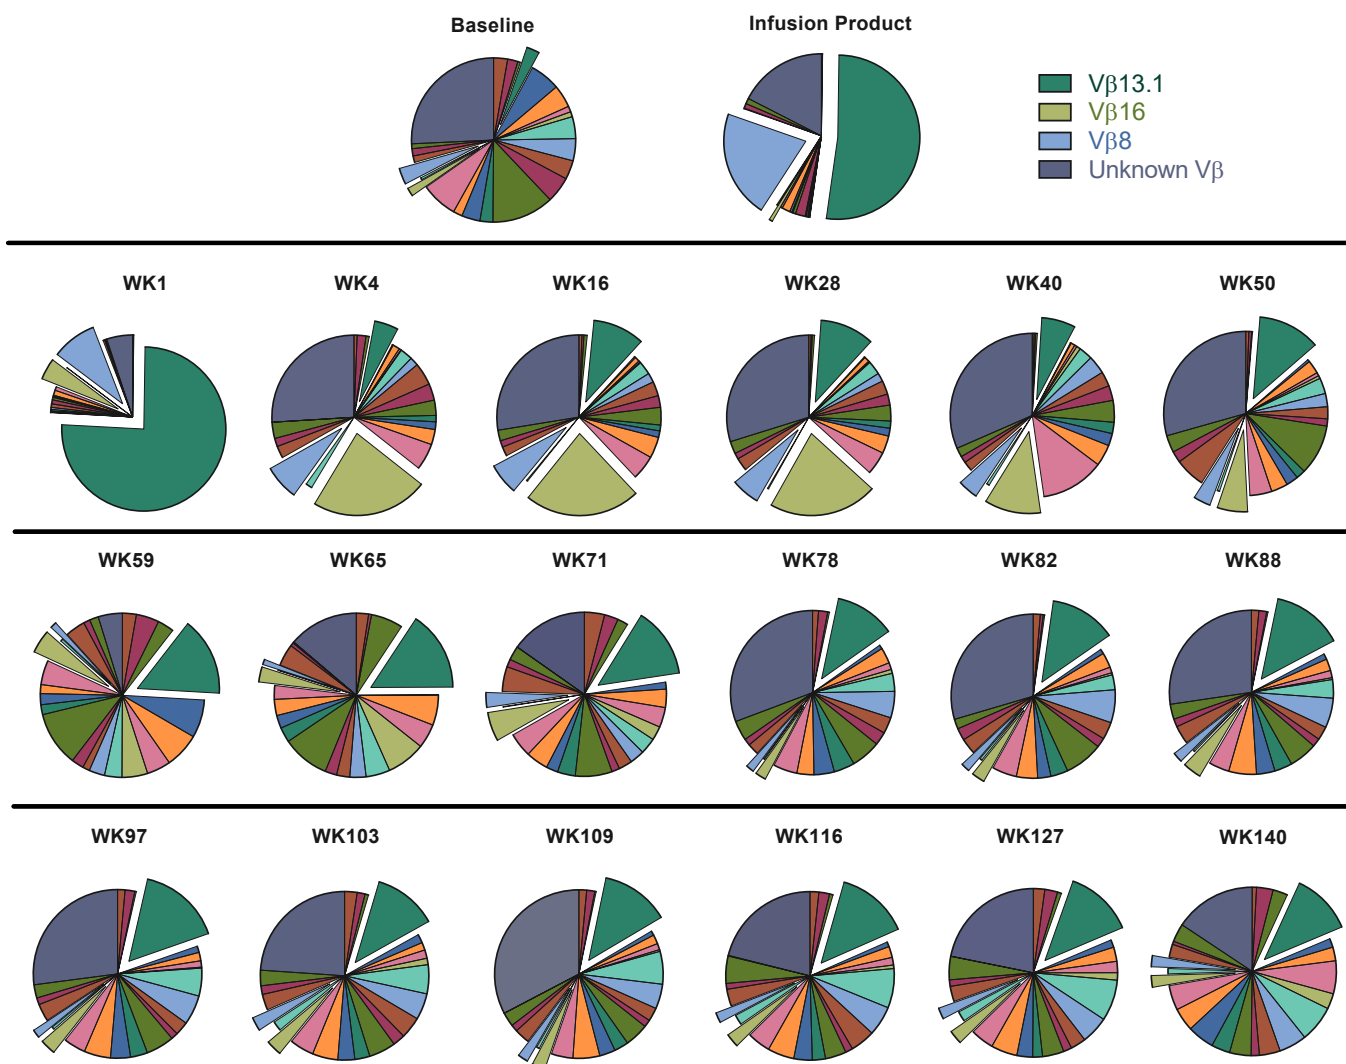

**Supplementary Figure 2.** Vβ repertoire analysis of CD8+ compartment (Patient 1)

Peripheral blood mononuclear cells taken before TIL therapy (Baseline) and after TIL infusion (WK1 – WK140) were analyzed by flow cytometry for the proportion of various TCR Vβ chains present in the CD8+ T cell compartment. This analysis was also performed on a sample of the TIL infusion product. The legend describes the color coding for three TCR Vβ populations of interest that are exploded from the pie charts: Vβ13.1, which was dominant in the infusion product and at many time points post-infusion; Vβ16, which was not dominant in the infusion product but expanded in peripheral blood post-infusion; and Vβ8, which was dominant in the infusion product and then declined post-infusion. The legend also indicates the population of T cells expressing TCR Vβ chains that were not interrogated by the Vβ antibody panel used (unknown Vβ chains).

**Patient 7 - Week 17 post-treatment biopsy**

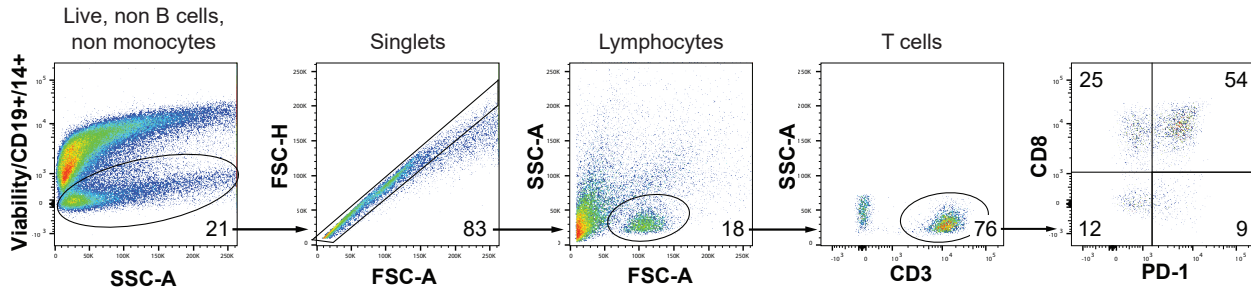

**Supplementary Figure 3. Flow cytometric analysis of post-treatment biopsy (Patient 7).**

A subcutaneous lesion was surgically removed from Patient 7 at 17 weeks following TIL infusion. After enzymatic dissociation of the tissue, the above gating strategy was applied to identify CD3+ lymphocytes for analysis of CD8 and PD-1 expression by flow cytometry.
